# Supplementary material for: GBP5 Repression Suppresses the Metastatic Potential and PD-L1 Expression in Triple-Negative Breast Cancer
Source: MDPI journal article supplement (doi:10.3390/biomedicines9040371), 2021-04-01
Supplement: s1 [file s1]

**Figure 3A**

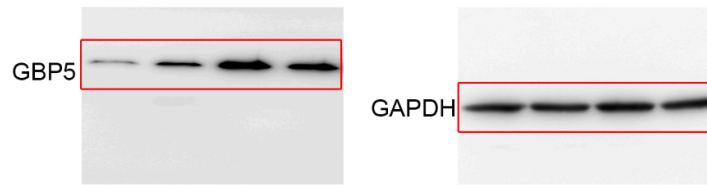

**Figure 3E**

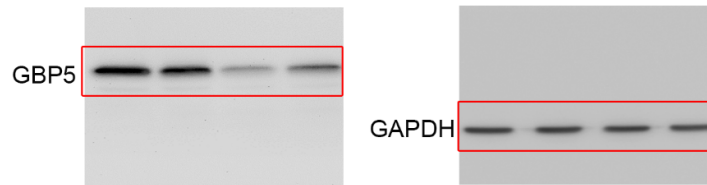

**Figure 3F**

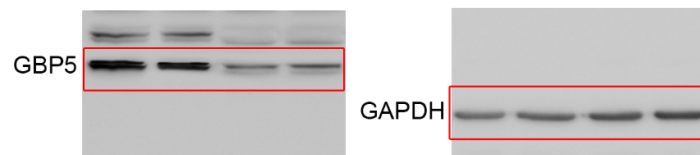

**Figure 5F**

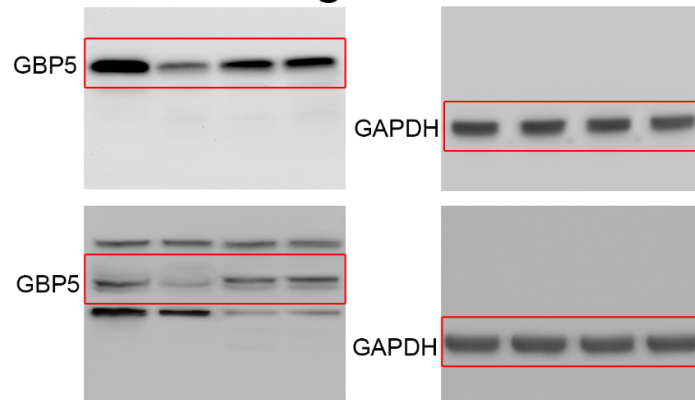

**Figure S1.** Raw data of Western blot. Raw data for Figures 3A,E,F and 5F.
